# Supplementary material for: Comprehensive Genomic Analysis and Expression Profiling of Phospholipase C Gene Family during Abiotic Stresses and Development in Rice
Source: PLoS One. 2013 Apr 30;8(4):e62494. doi: 10.1371/journal.pone.0062494 (PMC3640072; doi:10.1371/journal.pone.0062494)
Supplement: Table S1 — Microarray expression data for OsPLCs under three abiotic stresses. (XLSX) [file pone.0062494.s005.xlsx]

## Sheet: Sheet1
Table S1: Microarray expression data for OsPLCs under three abiotic stresses
				Salt Stress		Cold Stress		Drought Stress
	Probe Set ID	RGAP Locus	Gene	Folc change	Regulation	Folc change	Regulation	Folc change	Regulation
PI-PLC
1	Os.8107.1.S1_at	LOC_Os07g49330.1	OsPLC1	1.93594	UP	1.00886	UP	1.58585	UP
2	OsAffx.25128.1.S1_at	LOC_Os03g18010.1	OsPLC2	1.00205	UP	1.00569	Down	1.00236	UP
3	Os.8202.1.S1_at	LOC_Os12g37560.1	OsPLC3	1.27442	UP	1.33238	UP	1.62822	UP
4	Os.2243.1.S1_a_at	LOC_Os05g03610.1	OsPLC4	5.69427	Down	2.27833	Down	3.6553	Down
NPC
1	Os.5082.1.S1_a_at	LOC_Os03g61130.1	OsNPC1	1.42402	UP	1.2428	Down	1.27963	UP
2	Os.49135.1.S1_at	LOC_Os01g72520.1	OsNPC2	3.70815	UP	1.54459	UP	6.5913	UP
3	OsAffx.31359.1.S1_x_at	LOC_Os11g38050.1	OsNPC3	1		1		1.00003	Down
4	OsAffx.25809.1.S1_at	LOC_Os03g63580.1	OsNPC4	2.16868	UP	1.03986	UP	1.78679	UP
5	Os.33296.1.S1_at	LOC_Os01g01190.1	OsNPC5	1.17171	UP	2.24718	Down	1.48725	Down
